# Supplementary material for: A Comparative Analysis of the Metabolomic Response of Electron Beam Inactivated E. coli O26:H11 and Salmonella Typhimurium ATCC 13311
Source: PubMed Central journal article supplement (PMC6465604; doi:10.3389/fmicb.2019.00694), 2019-04-09
Supplement: Data_Sheet_1.pdf [file Data_Sheet_1.pdf]

Supplementary Data 1. Average Metabolite Concentration of Un-irradiated (0 kGy Control), Freshly Irradiated (EB 0 h), 24 Hour Post-Irradiation (EB 24 h) *E. coli* O26:H11

| Metabolite                    | Average Metabolite Concentration |         |         |
|-------------------------------|----------------------------------|---------|---------|
|                               | 0 kGy Control                    | EB 0 h  | EB 24 h |
| L-Threo-2-pentulose           | 1087                             | 993     | 1803    |
| D-Xylose                      | 2685                             | 13713   | 14167   |
| D-Xylono-1,5-lactone          | 2628                             | 1393    | 1797    |
| Xanthosine                    | 336                              | 522     | 4242    |
| Xanthine                      | 2788                             | 5518    | 7355    |
| L-Valine                      | 154300                           | 84687   | 304568  |
| Urocanic acid                 | 116                              | 155     | 166     |
| Uridine 5'-monophosphate      | 2133                             | 1123    | 760     |
| Uridine                       | 7694                             | 9319    | 5190    |
| Uracil                        | 98576                            | 116852  | 267797  |
| Tyrosol                       | 61                               | 50      | 68      |
| L-Tyrosine                    | 57352                            | 28617   | 32979   |
| L-Tryptophan                  | 8473                             | 5856    | 10038   |
| Trehalose                     | 2775                             | 2022    | 1400    |
| Thymine                       | 2444                             | 9553    | 30700   |
| 5-Thymidylic acid             | 317                              | 2121    | 1687    |
| Threonine                     | 7045                             | 5482    | 7418    |
| Lignocerane                   | 1549                             | 3766    | 1215    |
| 2,3-Dihydroxybutanedioic acid | 49                               | 736     | 844     |
| Sucrose                       | 646                              | 1992    | 15547   |
| Succinic acid                 | 6840                             | 9989    | 43369   |
| Stearic acid                  | 1176491                          | 1386187 | 1178966 |
| Spermidine                    | 376239                           | 195561  | 325089  |
| Serine                        | 9841                             | 9203    | 8017    |
| 2-Hydroxybenzaldehyde         | 429                              | 426     | 1172    |
| D-Ribulose 5-phosphate        | 822                              | 924     | 576     |
| Ribose-5-phosphate            | 1184                             | 1107    | 1196    |
| Ribose                        | 41206                            | 38062   | 51555   |
| Ribonic acid                  | 276                              | 341     | 418     |
| Raffinose                     | 77                               | 52      | 46      |
| Pyrophosphate                 | 130598                           | 80031   | 64453   |
| Putrescine                    | 851406                           | 552839  | 644559  |
| Pseudouridine                 | 1228                             | 1112    | 4526    |
| Proline                       | 24197                            | 13850   | 6921    |
| Pipicolinic acid              | 904                              | 385     | 811     |
| Pinitol                       | 27479                            | 6064    | 7382    |
| Hydroxyphenyllactic acid      | 514                              | 711     | 4308    |
| Phthalic acid                 | 1995                             | 4075    | 4915    |
| Phosphoethanolamine           | 11420                            | 14843   | 16456   |
| Phosphoenolpyruvate           | 3153                             | 3371    | 1837    |
| Phosphate                     | 298265                           | 276712  | 272488  |

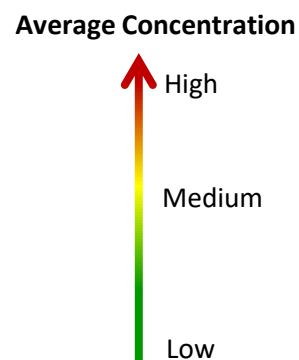

|                          |        |        |        |
|--------------------------|--------|--------|--------|
| Phenylpyruvate           | 2616   | 5044   | 10505  |
| Phenylethylamine         | 11317  | 8696   | 8580   |
| Phenylalanine            | 28256  | 13950  | 22880  |
| Pentadecanoic acid       | 6339   | 18118  | 29679  |
| Pelargonic acid          | 3006   | 8073   | 2897   |
| Oxalureate               | 638    | 12650  | 18916  |
| Pantothenic acid         | 1987   | 1177   | 2297   |
| Palmitic acid            | 149712 | 246634 | 149418 |
| Pyroglutamic acid        | 143503 | 139006 | 60362  |
| Oxalic acid              | 212    | 2995   | 2686   |
| Orotic acid              | 6573   | 180    | 159    |
| Ornithine                | 26362  | 9495   | 12031  |
| Oleic acid               | 295    | 481    | 268    |
| Octadecanol              | 343    | 576    | 273    |
| Noradrenaline            | 188    | 1635   | 807    |
| Nonadecanoic acid        | 1311   | 1898   | 1214   |
| Nicotinic acid           | 2353   | 2020   | 18772  |
| Nicotinamide             | 16327  | 15380  | 7387   |
| N-Acetylputrescine       | 802201 | 1877   | 370540 |
| N-Acetylornithine        | 1309   | 15302  | 18985  |
| Acetylglycine            | 330    | 913    | 672    |
| N-Acetyl-D-galactosamine | 172    | 780    | 626    |
| N-Acetylaspartic acid    | 328    | 628    | 708    |
| Myristic acid            | 2698   | 4310   | 3307   |
| Myo-Inositol             | 361    | 544    | 356    |
| Methionine sulfoxide     | 24615  | 7937   | 15335  |
| Methionine               | 4738   | 2055   | 3440   |
| Maltotriose              | 1157   | 919    | 246    |
| Maltose                  | 13339  | 10670  | 3973   |
| Malonic acid             | 95     | 1986   | 2407   |
| Malic acid               | 2379   | 3735   | 7444   |
| Lyxose                   | 1973   | 929    | 1472   |
| Lysine                   | 137263 | 88028  | 78755  |
| Leucine                  | 51406  | 20819  | 49772  |
| Lauric acid              | 4806   | 9350   | 6463   |
| Lactulose                | 552    | 723    | 700    |
| Lactic acid              | 2086   | 7256   | 3480   |
| Prostaglandin F2a        | 2585   | 968    | 917    |
| D-Threitol               | 42     | 77     | 643    |
| Isoribose                | 281    | 175    | 1663   |
| Isoleucine               | 92727  | 47881  | 99635  |
| Inosine                  | 243    | 201    | 5021   |
| Indole-3-lactate         | 145    | 286    | 1478   |
| indole-3-acetate         | 1395   | 897    | 6069   |
| Hypoxanthine             | 1803   | 3666   | 191369 |
| Hydroxylamine            | 30193  | 28787  | 31749  |
| Homoserine               | 2591   | 1971   | 3762   |

|                             |       |       |        |
|-----------------------------|-------|-------|--------|
| Histidine                   | 17280 | 6607  | 13536  |
| Glucose 6-phosphate         | 941   | 353   | 81     |
| Heptadecanoic acid          | 7142  | 12693 | 8095   |
| Guanosine                   | 7295  | 5974  | 7594   |
| Guanine                     | 11705 | 5544  | 8924   |
| Glycolic acid               | 1593  | 6157  | 14806  |
| Glycine                     | 14056 | 7501  | 9737   |
| DL-Glycerol 1-phosphate     | 8867  | 9794  | 10808  |
| Galactosylglycerol          | 2870  | 1116  | 1765   |
| Glyceric acid               | 3919  | 7089  | 20577  |
| Glutathione                 | 2017  | 1455  | 282    |
| Glutaric acid               | 670   | 428   | 4034   |
| Glutamine                   | 1327  | 479   | 1553   |
| Glutamic acid               | 82467 | 39991 | 22770  |
| Glucose-6-phosphate         | 1471  | 984   | 42     |
| Glucose-1-phosphate         | 1858  | 1750  | 2464   |
| Glucose                     | 1377  | 1882  | 1265   |
| Galactonic acid             | 477   | 346   | 533    |
| Galactinol                  | 174   | 123   | 156    |
| Fumaric acid                | 5180  | 6398  | 16501  |
| Fucose                      | 8722  | 7748  | 11768  |
| Fructose-6-phosphate        | 759   | 356   | 126    |
| Fructose                    | 293   | 2141  | 1411   |
| Ethanolamine                | 48490 | 33181 | 288279 |
| Dodecanol                   | 434   | 989   | 448    |
| Dehydroascorbic acid        | 276   | 4235  | 4294   |
| Dehydroabietate             | 3634  | 2680  | 2651   |
| Cytosine                    | 864   | 1137  | 1455   |
| Cytidine monophosphate      | 1934  | 3226  | 1741   |
| Cysteinylglycine            | 6270  | 1875  | 2390   |
| Cysteine                    | 8087  | 570   | 1701   |
| Conduritol-beta-epoxide     | 11462 | 1818  | 1606   |
| Citrulline                  | 4827  | 2522  | 2416   |
| Citric acid                 | 12168 | 26915 | 18047  |
| Citramalic acid             | 225   | 877   | 760    |
| Citraconic acid             | 4621  | 10041 | 20075  |
| Cholesterol                 | 343   | 734   | 1067   |
| Cellobiose                  | 2442  | 1966  | 797    |
| Capric acid                 | 233   | 878   | 348    |
| 2-Pyrrolidinone             | 1620  | 1644  | 1349   |
| Beta-Hydroxymyristic acid   | 156   | 120   | 223    |
| Beta-Glycerophosphoric acid | 344   | 330   | 367    |
| Gentiobiose                 | 335   | 73    | 39     |
| Beta-Alanine                | 323   | 4399  | 6258   |
| Benzoic acid                | 1020  | 1534  | 976    |
| Behenic acid                | 3636  | 4930  | 5074   |
| Aspartic acid               | 34013 | 23804 | 11667  |

|                            |        |       |        |
|----------------------------|--------|-------|--------|
| Arachidic acid             | 13176  | 21259 | 13067  |
| Aminomalonate              | 414    | 173   | 324    |
| Alpha-Ketoglutarate        | 458    | 994   | 293    |
| Alpha-Aminoadipic acid     | 120    | 183   | 605    |
| Alanine-?-Alanine          | 91995  | 31179 | 23405  |
| D-Alanyl-D-alanine         | 2577   | 9888  | 701    |
| Alanine                    | 60446  | 41338 | 75911  |
| Adipic acid                | 1432   | 2517  | 1176   |
| Adenosine monophosphate    | 22851  | 15192 | 23656  |
| Adenosine                  | 28222  | 28424 | 30923  |
| Adenine                    | 95959  | 81243 | 142314 |
| Acetophenone               | 2858   | 3899  | 2671   |
| 7-Methylguanine            | 111    | 110   | 652    |
| Quinovose                  | 1564   | 31547 | 45045  |
| Glucitol, 6-deoxy-         | 2029   | 1218  | 1406   |
| 5-Methoxytryptamine        | 8531   | 8416  | 7454   |
| 5'-Methylthioadenosine     | 2838   | 4018  | 2845   |
| 5-Aminovaleric acid        | 3476   | 1457  | 9884   |
| 4-Hydroxyphenylacetic acid | 5781   | 2979  | 21905  |
| 4-Hydroxybutyric acid      | 677    | 99    | 804    |
| 4-Hydroxybenzoate          | 748    | 469   | 2137   |
| 4-Aminobutanoate           | 25328  | 6966  | 2145   |
| 3-Phosphoglycerate         | 17465  | 15615 | 6098   |
| 3-Phenyllactic acid        | 3012   | 2838  | 24507  |
| 3-Hydroxybutyric acid      | 1065   | 3476  | 2746   |
| 3'-Adenylic acid           | 7167   | 3851  | 3715   |
| Propanoic acid             | 503    | 282   | 888    |
| 2-Ketoisocaproic acid      | 7210   | 22715 | 54290  |
| 2-Ketoadipic acid          | 2295   | 3289  | 3435   |
| 2-Hydroxyvaleric acid      | 1759   | 3888  | 4042   |
| 2-Hydroxyhexanoic acid     | 3393   | 1171  | 12003  |
| D-2-Hydroxyglutaric acid   | 1319   | 723   | 2957   |
| 2,4-Dihydroxybutanoic acid | 3181   | 3581  | 4109   |
| 2,5-Dihydropyrazine        | 12955  | 4542  | 3890   |
| 2,4-Diaminobutyric acid    | 104    | 3146  | 2351   |
| 4-Deoxyerythronic acid     | 47     | 454   | 805    |
| 1-Monostearin              | 357    | 442   | 400    |
| 1-Monopalmitin             | 1836   | 1043  | 1253   |
| 1-Deoxyerythritol          | 109358 | 35432 | 5858   |
| 1,3-Diaminopropane         | 1922   | 1793  | 2104   |
| 704730                     | 710    | 292   | 983    |
| 160962                     | 2863   | 5308  | 2475   |
| 160842                     | 5533   | 2619  | 7133   |
| 159824                     | 2389   | 2760  | 1788   |
| 146957                     | 3337   | 2972  | 3097   |
| 146262                     | 278    | 316   | 913    |
| 146042                     | 55724  | 9494  | 10451  |

|        |        |        |        |
|--------|--------|--------|--------|
| 145865 | 508    | 794    | 4611   |
| 134760 | 1388   | 32354  | 45153  |
| 134752 | 48     | 260    | 349    |
| 134122 | 272    | 395    | 587    |
| 133242 | 2118   | 4134   | 3164   |
| 132976 | 2205   | 1366   | 513    |
| 131620 | 78259  | 73198  | 71453  |
| 130797 | 1432   | 4397   | 4123   |
| 130396 | 805    | 761    | 630    |
| 129313 | 94     | 52     | 73     |
| 127277 | 3307   | 3361   | 4913   |
| 125786 | 256    | 2153   | 834    |
| 124903 | 8466   | 14662  | 8380   |
| 124568 | 4782   | 885    | 1252   |
| 123989 | 83     | 534    | 592    |
| 121002 | 1404   | 1736   | 1540   |
| 120789 | 1292   | 1371   | 1347   |
| 119066 | 1080   | 1996   | 1208   |
| 113700 | 2529   | 907    | 4253   |
| 112264 | 26992  | 26606  | 32162  |
| 111826 | 3540   | 6703   | 3115   |
| 111057 | 694    | 480    | 356    |
| 110359 | 511    | 679    | 1351   |
| 110346 | 382    | 1011   | 1071   |
| 110265 | 205    | 1104   | 1989   |
| 110131 | 1556   | 769    | 1421   |
| 108309 | 479    | 341    | 1622   |
| 106742 | 180167 | 266625 | 220710 |
| 104906 | 3677   | 5502   | 4408   |
| 104022 | 5706   | 2213   | 2602   |
| 103857 | 69     | 495    | 265    |
| 103138 | 5819   | 4218   | 6381   |
| 103102 | 25569  | 25581  | 22518  |
| 102232 | 3388   | 1569   | 1779   |
| 100723 | 6074   | 361    | 4965   |
| 88786  | 4479   | 1749   | 1144   |
| 88502  | 3156   | 4956   | 3709   |
| 88046  | 4439   | 2311   | 1754   |
| 87947  | 78     | 60     | 66     |
| 87312  | 1075   | 3813   | 691    |
| 87282  | 3434   | 2724   | 12689  |
| 84565  | 1630   | 1849   | 622    |
| 84209  | 8347   | 8782   | 7402   |
| 66261  | 74     | 2104   | 1147   |
| 48608  | 68     | 1444   | 1401   |
| 47420  | 4657   | 2933   | 6953   |
| 47170  | 841    | 1349   | 594    |

|       |      |       |       |
|-------|------|-------|-------|
| 46357 | 2660 | 10006 | 13162 |
| 46128 | 694  | 1077  | 624   |
| 41989 | 76   | 661   | 674   |
| 41811 | 851  | 1016  | 797   |
| 41808 | 838  | 1217  | 1187  |
| 33999 | 69   | 297   | 379   |
| 32148 | 529  | 729   | 3235  |
| 31460 | 1147 | 2014  | 1031  |
| 31408 | 1287 | 1986  | 1361  |
| 31362 | 4132 | 8221  | 3384  |
| 31359 | 1406 | 2801  | 1768  |
| 31285 | 3579 | 4742  | 10527 |
| 26062 | 155  | 333   | 149   |
| 21885 | 1176 | 2227  | 1128  |
| 21683 | 2697 | 2760  | 3462  |
| 21666 | 3746 | 3591  | 1662  |
| 21665 | 1737 | 4265  | 2027  |
| 21664 | 5167 | 4981  | 3338  |
| 21511 | 862  | 1210  | 2118  |
| 20903 | 6504 | 3321  | 5572  |
| 20330 | 2590 | 5499  | 2008  |
| 20282 | 2898 | 980   | 2475  |
| 18588 | 1129 | 916   | 1152  |
| 18485 | 3670 | 5090  | 2447  |
| 18266 | 915  | 394   | 357   |
| 18248 | 290  | 87    | 707   |
| 18225 | 864  | 856   | 923   |
| 18177 | 2879 | 977   | 2252  |
| 17962 | 3472 | 6650  | 2988  |
| 17830 | 1116 | 479   | 572   |
| 17775 | 42   | 684   | 567   |
| 17651 | 440  | 833   | 380   |
| 17463 | 146  | 140   | 114   |
| 17437 | 2248 | 1076  | 1681  |
| 17245 | 1195 | 1584  | 1272  |
| 17068 | 667  | 593   | 731   |
| 17002 | 1162 | 740   | 1212  |
| 14703 | 1414 | 2393  | 3876  |
| 14697 | 1821 | 635   | 424   |
| 10176 | 122  | 170   | 472   |
| 9320  | 7218 | 9237  | 4324  |
| 7408  | 877  | 2990  | 2576  |
| 7403  | 112  | 4367  | 4127  |
| 5691  | 1709 | 2761  | 12472 |
| 5523  | 2450 | 4726  | 2016  |
| 5346  | 4978 | 8195  | 4846  |
| 4945  | 757  | 850   | 832   |

|      |       |       |       |
|------|-------|-------|-------|
| 4937 | 970   | 1633  | 971   |
| 4850 | 28    | 912   | 1159  |
| 4712 | 809   | 1702  | 1735  |
| 4550 | 964   | 1138  | 746   |
| 4265 | 3174  | 6405  | 2860  |
| 4264 | 3794  | 8133  | 2718  |
| 4263 | 4529  | 8899  | 4139  |
| 3188 | 1620  | 3653  | 3509  |
| 3122 | 18608 | 11849 | 9076  |
| 2847 | 347   | 838   | 316   |
| 2706 | 1184  | 2803  | 1650  |
| 2543 | 1596  | 546   | 921   |
| 2503 | 2354  | 1147  | 589   |
| 2438 | 11932 | 6058  | 11144 |
| 2262 | 4969  | 7696  | 7518  |
| 2242 | 10151 | 7390  | 9490  |
| 2233 | 3224  | 2367  | 1786  |
| 2042 | 2540  | 3648  | 8875  |
| 2039 | 1868  | 2366  | 3258  |
| 2031 | 20382 | 7438  | 8944  |
| 2030 | 1353  | 1624  | 1530  |
| 2028 | 685   | 378   | 470   |
| 2017 | 640   | 453   | 1899  |
| 2001 | 2397  | 685   | 269   |
| 1996 | 332   | 3450  | 3333  |
| 1981 | 1637  | 1458  | 2141  |
| 1970 | 2377  | 860   | 768   |
| 1969 | 383   | 437   | 472   |
| 1941 | 743   | 572   | 764   |
| 1912 | 1393  | 2599  | 1359  |
| 1878 | 3584  | 6819  | 4550  |
| 1875 | 4244  | 6518  | 4605  |
| 1872 | 5281  | 7023  | 5483  |
| 1852 | 418   | 341   | 1216  |
| 1826 | 1044  | 313   | 1182  |
| 1815 | 1591  | 5839  | 2732  |
| 1812 | 1339  | 838   | 650   |
| 1809 | 1876  | 1510  | 1554  |
| 1806 | 5359  | 985   | 2196  |
| 1805 | 2648  | 3101  | 1095  |
| 1803 | 351   | 635   | 714   |
| 1799 | 8939  | 72153 | 85972 |
| 1760 | 2449  | 837   | 500   |
| 1753 | 4114  | 5572  | 6515  |
| 1751 | 6227  | 8761  | 6493  |
| 1746 | 893   | 463   | 452   |
| 1744 | 724   | 1027  | 684   |

|      |         |         |         |
|------|---------|---------|---------|
| 1737 | 3615    | 802     | 1381    |
| 1735 | 1959    | 666     | 965     |
| 1725 | 3132    | 4501    | 2837    |
| 1721 | 1789    | 1053    | 1169    |
| 1719 | 162     | 84      | 1036    |
| 1717 | 20237   | 15429   | 13994   |
| 1713 | 2566    | 782     | 718     |
| 1708 | 3167    | 1212    | 1236    |
| 1702 | 6650    | 1260    | 1859    |
| 1701 | 879     | 172     | 610     |
| 1696 | 344     | 267     | 346     |
| 1675 | 7346    | 551     | 236     |
| 1673 | 1991    | 929     | 1508    |
| 1666 | 1242    | 1368    | 2382    |
| 1661 | 2712517 | 1715809 | 2601839 |
| 1064 | 2109    | 4126    | 2276    |
| 816  | 5414    | 4083    | 7335    |
| 453  | 27407   | 21061   | 28284   |
| 443  | 10205   | 10148   | 8663    |
| 307  | 9950    | 28000   | 16211   |
| 257  | 1579    | 2363    | 1332    |
| 168  | 1395    | 1078    | 1258    |
| 137  | 2714    | 8944    | 4683    |
| 134  | 14416   | 9573    | 7818    |
| 110  | 2124    | 2837    | 4747    |
| 47   | 7671    | 13929   | 8800    |
