# Supplementary material for: A Comparative Analysis of the Metabolomic Response of Electron Beam Inactivated E. coli O26:H11 and Salmonella Typhimurium ATCC 13311
Source: PubMed Central journal article supplement (PMC6465604; doi:10.3389/fmicb.2019.00694), 2019-04-09
Supplement: Data_Sheet_2.pdf [file Data_Sheet_2.pdf]

Supplementary Data 2. Average Metabolite Concentration of Un-irradiated (0 kGy Control), Freshly Irradiated (EB 0 h), 24 Hour Post-Irradiation (EB 24 h) *S. Typhimurium*

| Metabolite                    | Average Metabolite Concentration |         |         |
|-------------------------------|----------------------------------|---------|---------|
|                               | 0 kGy Control                    | EB 0 h  | EB 24 h |
| L-Threo-2-pentulose           | 2805                             | 2275    | 2590    |
| D-Xylose                      | 6847                             | 1       | 7173    |
| D-Xylono-1,5-lactone          | 3108                             | 2484    | 1911    |
| Xanthosine                    | 393                              | 198     | 1349    |
| Xanthine                      | 96                               | 36      | 289     |
| L-Valine                      | 107503                           | 42885   | 159849  |
| Urocanic acid                 | 590                              | 357     | 955     |
| Uridine 5'-monophosphate      | 713                              | 486     | 416     |
| Uridine                       | 30206                            | 38188   | 34662   |
| Uracil                        | 250447                           | 194823  | 350854  |
| Tyrosol                       | 117                              | 142     | 1890    |
| L-Tyrosine                    | 42433                            | 15391   | 27236   |
| L-Tryptophan                  | 16733                            | 4535    | 9892    |
| Trehalose                     | 738                              | 362     | 134     |
| Thymine                       | 2678                             | 4320    | 18744   |
| 5-Thymidylic acid             | 444                              | 385     | 798     |
| Threonine                     | 5901                             | 2834    | 3184    |
| Lignocerane                   | 1593                             | 1370    | 1880    |
| 2,3-Dihydroxybutanedioic acid | 61                               | 447     | 488     |
| Sucrose                       | 4171                             | 79580   | 102235  |
| Succinic acid                 | 1691                             | 2613    | 21468   |
| Stearic acid                  | 1164487                          | 821496  | 1352128 |
| Spermidine                    | 290154                           | 192745  | 151005  |
| Serine                        | 7627                             | 4411    | 5298    |
| 2-Hydroxybenzaldehyde         | 268                              | 226     | 4056    |
| D-Ribulose 5-phosphate        | 381                              | 361     | 209     |
| Ribose-5-phosphate            | 655                              | 887     | 551     |
| Ribose                        | 121047                           | 105492  | 88376   |
| Ribonic acid                  | 171                              | 344     | 254     |
| Raffinose                     | 727                              | 645     | 507     |
| Pyrophosphate                 | 96915                            | 94100   | 45286   |
| Putrescine                    | 1539597                          | 1118267 | 1238998 |
| Pseudouridine                 | 902                              | 795     | 3219    |
| Proline                       | 10519                            | 6136    | 4101    |
| Pipicolinic acid              | 202                              | 132     | 181     |
| Pinitol                       | 5813                             | 1937    | 1579    |
| Hydroxyphenyllactic acid      | 149                              | 78      | 475     |
| Phthalic acid                 | 2323                             | 5352    | 1746    |
| Phosphoethanolamine           | 18588                            | 13310   | 12940   |
| Phosphoenolpyruvate           | 724                              | 1509    | 2098    |
| Phosphate                     | 450729                           | 413717  | 284875  |

Average Concentration

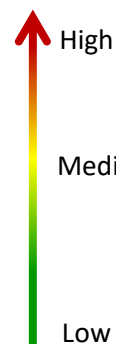

|                          |        |        |        |
|--------------------------|--------|--------|--------|
| Phenylpyruvate           | 470    | 269    | 2836   |
| Phenylethylamine         | 1194   | 1106   | 1040   |
| Phenylalanine            | 43240  | 12760  | 39466  |
| Pentadecanoic acid       | 3166   | 2233   | 2943   |
| Pelargonic acid          | 3386   | 7920   | 2861   |
| Oxalureate               | 920    | 16229  | 11619  |
| Pantothenic acid         | 364    | 268    | 402    |
| Palmitic acid            | 141607 | 100525 | 164061 |
| Pyroglutamic acid        | 76439  | 49054  | 30312  |
| Oxalic acid              | 237    | 1779   | 1520   |
| Orotic acid              | 372    | 93     | 166    |
| Ornithine                | 7402   | 2134   | 3579   |
| Oleic acid               | 343    | 301    | 378    |
| Octadecanol              | 385    | 348    | 340    |
| Noradrenaline            | 115    | 1026   | 1824   |
| Nonadecanoic acid        | 1216   | 3032   | 1212   |
| Nicotinic acid           | 11908  | 6973   | 17151  |
| Nicotinamide             | 8211   | 7332   | 4994   |
| N-Acetylputrescine       | 5036   | 2295   | 8079   |
| N-Acetylornithine        | 2992   | 35055  | 34778  |
| Acetylglycine            | 7917   | 298    | 667    |
| N-Acetyl-D-galactosamine | 247    | 217    | 251    |
| N-Acetylaspartic acid    | 175    | 93     | 144    |
| Myristic acid            | 2911   | 2118   | 2576   |
| Myo-Inositol             | 441    | 226    | 170    |
| Methionine sulfoxide     | 5595   | 3697   | 3869   |
| Methionine               | 94     | 67     | 92     |
| Maltotriose              | 369    | 178    | 45     |
| Maltose                  | 3397   | 2748   | 1993   |
| Malonic acid             | 108    | 1485   | 1263   |
| Malic acid               | 1367   | 2238   | 3279   |
| Lyxose                   | 2225   | 1711   | 1259   |
| Lysine                   | 34834  | 17970  | 4741   |
| Leucine                  | 49581  | 14196  | 36849  |
| Lauric acid              | 2474   | 4844   | 5963   |
| Lactulose                | 59     | 315    | 395    |
| Lactic acid              | 1720   | 1978   | 1595   |
| Prostaglandin F2a        | 687    | 534    | 416    |
| D-Threitol               | 191    | 237    | 144    |
| Isoribose                | 500    | 22714  | 315    |
| Isoleucine               | 95305  | 28855  | 93882  |
| Inosine                  | 255    | 238    | 4244   |
| Indole-3-lactate         | 103    | 65     | 243    |
| Indole-3-acetate         | 362    | 251    | 1449   |
| Hypoxanthine             | 3000   | 2606   | 79935  |
| Hydroxylamine            | 27195  | 27345  | 34609  |
| Homoserine               | 1840   | 1211   | 1494   |

|                             |       |       |        |
|-----------------------------|-------|-------|--------|
| Histidine                   | 3361  | 1409  | 929    |
| Glucose 6-phosphate         | 533   | 221   | 559    |
| Heptadecanoic acid          | 6910  | 5389  | 7624   |
| Guanosine                   | 41222 | 34983 | 65135  |
| Guanine                     | 27986 | 23973 | 102215 |
| Glycolic acid               | 2347  | 6393  | 11665  |
| Glycine                     | 9442  | 3827  | 10576  |
| DL-Glycerol 1-phosphate     | 12033 | 9528  | 7205   |
| Galactosylglycerol          | 7274  | 3721  | 3382   |
| Glyceric acid               | 3478  | 6892  | 23655  |
| Glutathione                 | 790   | 331   | 281    |
| Glutaric acid               | 218   | 291   | 403    |
| Glutamine                   | 422   | 574   | 312    |
| Glutamic acid               | 34449 | 23015 | 12208  |
| Glucose-6-phosphate         | 1702  | 935   | 1228   |
| Glucose-1-phosphate         | 3806  | 4357  | 4466   |
| Glucose                     | 827   | 1166  | 128    |
| Galactonic acid             | 129   | 371   | 128    |
| Galactinol                  | 1754  | 1507  | 875    |
| Fumaric acid                | 1760  | 1740  | 3484   |
| Fucose                      | 1125  | 1034  | 1152   |
| Fructose-6-phosphate        | 1348  | 624   | 990    |
| Fructose                    | 519   | 312   | 296    |
| Ethanolamine                | 91172 | 48660 | 32633  |
| Dodecanol                   | 697   | 478   | 570    |
| Dehydroascorbic acid        | 284   | 237   | 383    |
| Dehydroabietate             | 5068  | 2649  | 3403   |
| Cytosine                    | 2070  | 1992  | 2764   |
| Cytidine monophosphate      | 2092  | 1380  | 1567   |
| Cysteinyglycine             | 819   | 662   | 588    |
| Cysteine                    | 212   | 80    | 286    |
| Conduritol-beta-epoxide     | 3554  | 697   | 710    |
| Citrulline                  | 1643  | 1016  | 727    |
| Citric acid                 | 3801  | 5696  | 5525   |
| Citramalic acid             | 305   | 317   | 429    |
| Citraconic acid             | 4068  | 3815  | 6766   |
| Cholesterol                 | 289   | 707   | 345    |
| Cellobiose                  | 643   | 309   | 75     |
| Capric acid                 | 374   | 373   | 371    |
| 2-Pyrrolidinone             | 454   | 872   | 1144   |
| Beta-Hydroxymyristic acid   | 110   | 89    | 390    |
| Beta-Glycerophosphoric acid | 404   | 270   | 356    |
| Gentiobiose                 | 3860  | 1729  | 1849   |
| Beta-Alanine                | 1774  | 5010  | 5154   |
| Benzoic acid                | 1311  | 1047  | 1240   |
| Behenic acid                | 13791 | 19539 | 21304  |
| Aspartic acid               | 12836 | 8558  | 4509   |

|                            |        |        |        |
|----------------------------|--------|--------|--------|
| Arachidic acid             | 18807  | 4359   | 16100  |
| Aminomalonate              | 195    | 196    | 202    |
| Alpha-Ketoglutarate        | 35     | 42     | 45     |
| Alpha-Aminoadipic acid     | 81     | 95     | 481    |
| Alanine-?-Alanine          | 451    | 537    | 700    |
| D-Alanyl-D-alanine         | 143    | 3200   | 85     |
| Alanine                    | 61574  | 36702  | 40065  |
| Adipic acid                | 1235   | 443    | 770    |
| Adenosine monophosphate    | 15719  | 11558  | 12627  |
| Adenosine                  | 132031 | 122072 | 158352 |
| Adenine                    | 208809 | 140678 | 365902 |
| Acetophenone               | 3073   | 2437   | 3061   |
| 7-Methylguanine            | 159    | 100    | 446    |
| Quinovose                  | 753    | 1465   | 2483   |
| Glucitol, 6-deoxy-         | 665    | 628    | 525    |
| 5-Methoxytryptamine        | 5015   | 5581   | 2852   |
| 5'-Methylthioadenosine     | 402    | 197    | 188    |
| 5-Aminovaleric acid        | 1087   | 680    | 2169   |
| 4-Hydroxyphenylacetic acid | 738    | 688    | 5965   |
| 4-Hydroxybutyric acid      | 747    | 115    | 174    |
| 4-Hydroxybenzoate          | 286    | 165    | 668    |
| 4-Aminobutanoate           | 587    | 457    | 1233   |
| 3-Phosphoglycerate         | 12164  | 9697   | 10100  |
| 3-Phenyllactic acid        | 675    | 380    | 4144   |
| 3-Hydroxybutyric acid      | 3742   | 2000   | 2987   |
| 3'-Adenylic acid           | 15158  | 10744  | 4691   |
| Propanoic acid             | 887    | 404    | 516    |
| 2-Ketoisocaproic acid      | 2241   | 1323   | 2248   |
| 2-Ketoadipic acid          | 2916   | 4345   | 4569   |
| 2-Hydroxyvaleric acid      | 292    | 2103   | 2659   |
| 2-Hydroxyhexanoic acid     | 535    | 332    | 2052   |
| D-2-Hydroxyglutaric acid   | 199    | 448    | 954    |
| 2,4-Dihydroxybutanoic acid | 282    | 893    | 936    |
| 2,5-Dihydropyrazine        | 3336   | 1847   | 799    |
| 2,4-Diaminobutyric acid    | 222    | 3333   | 3332   |
| 4-Deoxyerythronic acid     | 37     | 100    | 131    |
| 1-Monostearin              | 542    | 316    | 357    |
| 1-Monopalmitin             | 6007   | 3616   | 2651   |
| 1-Deoxyerythritol          | 131431 | 113556 | 37256  |
| 1,3-Diaminopropane         | 2114   | 1540   | 1705   |
| 704730                     | 1209   | 1060   | 873    |
| 160962                     | 2786   | 1578   | 3427   |
| 160842                     | 3212   | 2118   | 6928   |
| 159824                     | 2485   | 2450   | 2227   |
| 146957                     | 4025   | 2854   | 3467   |
| 146262                     | 453    | 295    | 362    |
| 146042                     | 814    | 25640  | 36863  |

|        |        |        |        |
|--------|--------|--------|--------|
| 145865 | 492    | 620    | 1945   |
| 134760 | 753    | 1313   | 2446   |
| 134752 | 56     | 276    | 184    |
| 134122 | 468    | 319    | 241    |
| 133242 | 2109   | 2013   | 2317   |
| 132976 | 1528   | 3671   | 1837   |
| 131620 | 89075  | 67779  | 75353  |
| 130797 | 1605   | 3562   | 3666   |
| 130396 | 576    | 994    | 531    |
| 129313 | 4581   | 1224   | 2289   |
| 127277 | 5060   | 2666   | 2914   |
| 125786 | 5131   | 2168   | 2421   |
| 124903 | 7486   | 8263   | 8118   |
| 124568 | 1330   | 304    | 709    |
| 123989 | 64     | 535    | 465    |
| 121002 | 1814   | 1555   | 1405   |
| 120789 | 193    | 137    | 266    |
| 119066 | 1060   | 824    | 1022   |
| 113700 | 155    | 230    | 1121   |
| 112264 | 12541  | 9117   | 16407  |
| 111826 | 3075   | 1769   | 4350   |
| 111057 | 291    | 453    | 122    |
| 110359 | 1001   | 470    | 1973   |
| 110346 | 4772   | 2935   | 9272   |
| 110265 | 250    | 824    | 2392   |
| 110131 | 1682   | 895    | 1014   |
| 108309 | 275    | 143    | 354    |
| 106742 | 268313 | 195512 | 241923 |
| 104906 | 4247   | 3110   | 3613   |
| 104022 | 311    | 498    | 247    |
| 103857 | 38     | 57     | 95     |
| 103138 | 492    | 328    | 155    |
| 103102 | 27592  | 22468  | 16942  |
| 102232 | 2969   | 1814   | 2080   |
| 100723 | 5437   | 6191   | 476    |
| 88786  | 848    | 293    | 555    |
| 88502  | 3660   | 2846   | 3362   |
| 88046  | 1432   | 848    | 387    |
| 87947  | 102    | 108    | 109    |
| 87312  | 1775   | 1019   | 1623   |
| 87282  | 1092   | 681    | 2230   |
| 84565  | 1084   | 817    | 415    |
| 84209  | 5028   | 5603   | 2869   |
| 66261  | 153    | 1449   | 2484   |
| 48608  | 50     | 213    | 222    |
| 47420  | 3561   | 2308   | 2373   |
| 47170  | 886    | 448    | 918    |

|       |      |       |      |
|-------|------|-------|------|
| 46357 | 1259 | 10855 | 9490 |
| 46128 | 736  | 432   | 657  |
| 41989 | 91   | 700   | 388  |
| 41811 | 819  | 246   | 600  |
| 41808 | 988  | 742   | 947  |
| 33999 | 84   | 298   | 178  |
| 32148 | 128  | 500   | 1020 |
| 31460 | 846  | 1046  | 1123 |
| 31408 | 1353 | 1191  | 1254 |
| 31362 | 3361 | 1991  | 5350 |
| 31359 | 1544 | 1531  | 1327 |
| 31285 | 2580 | 2075  | 6269 |
| 26062 | 1149 | 775   | 2570 |
| 21885 | 1509 | 1264  | 1233 |
| 21683 | 2565 | 2121  | 3332 |
| 21666 | 2847 | 3750  | 3306 |
| 21665 | 2263 | 2450  | 2288 |
| 21664 | 2981 | 2406  | 2700 |
| 21511 | 269  | 1878  | 3529 |
| 20903 | 1194 | 3868  | 4777 |
| 20330 | 2460 | 1552  | 3290 |
| 20282 | 6077 | 6475  | 4564 |
| 18588 | 117  | 48    | 63   |
| 18485 | 3774 | 2508  | 4979 |
| 18266 | 268  | 143   | 61   |
| 18248 | 208  | 202   | 46   |
| 18225 | 586  | 2320  | 591  |
| 18177 | 122  | 121   | 385  |
| 17962 | 3364 | 1657  | 4617 |
| 17830 | 2125 | 1619  | 774  |
| 17775 | 167  | 393   | 113  |
| 17651 | 640  | 221   | 335  |
| 17463 | 2542 | 666   | 375  |
| 17437 | 2570 | 2191  | 1879 |
| 17245 | 1559 | 1447  | 1361 |
| 17068 | 629  | 829   | 912  |
| 17002 | 1663 | 1486  | 413  |
| 14703 | 194  | 473   | 673  |
| 14697 | 352  | 169   | 111  |
| 10176 | 845  | 787   | 1403 |
| 9320  | 7135 | 7350  | 7682 |
| 7408  | 342  | 1633  | 2454 |
| 7403  | 55   | 3313  | 3269 |
| 5691  | 228  | 1146  | 743  |
| 5523  | 2509 | 1381  | 3260 |
| 5346  | 4924 | 4976  | 4722 |
| 4945  | 790  | 677   | 674  |

|      |       |       |       |
|------|-------|-------|-------|
| 4937 | 1268  | 864   | 867   |
| 4850 | 41    | 76    | 63    |
| 4712 | 3872  | 3581  | 5565  |
| 4550 | 897   | 998   | 755   |
| 4265 | 2999  | 2033  | 3558  |
| 4264 | 3093  | 2103  | 5221  |
| 4263 | 4598  | 2264  | 6011  |
| 3188 | 860   | 487   | 355   |
| 3122 | 7571  | 12008 | 773   |
| 2847 | 1152  | 874   | 761   |
| 2706 | 2568  | 1649  | 2598  |
| 2543 | 1253  | 909   | 965   |
| 2503 | 879   | 443   | 230   |
| 2438 | 27329 | 20235 | 19607 |
| 2262 | 4861  | 7683  | 5768  |
| 2242 | 32198 | 32955 | 21957 |
| 2233 | 1489  | 615   | 387   |
| 2042 | 829   | 1277  | 7688  |
| 2039 | 2215  | 2309  | 1714  |
| 2031 | 3784  | 1888  | 1741  |
| 2030 | 2262  | 1478  | 2888  |
| 2028 | 3025  | 1411  | 3237  |
| 2017 | 204   | 373   | 717   |
| 2001 | 1018  | 2721  | 1388  |
| 1996 | 396   | 3513  | 3074  |
| 1981 | 2150  | 1774  | 1482  |
| 1970 | 2227  | 1137  | 1067  |
| 1969 | 687   | 421   | 1545  |
| 1941 | 820   | 898   | 662   |
| 1912 | 1817  | 1278  | 1612  |
| 1878 | 4857  | 3849  | 3807  |
| 1875 | 4119  | 4160  | 3796  |
| 1872 | 5742  | 4700  | 4018  |
| 1852 | 565   | 374   | 1219  |
| 1826 | 2443  | 1031  | 2788  |
| 1815 | 3874  | 1570  | 4913  |
| 1812 | 657   | 269   | 164   |
| 1809 | 1709  | 668   | 1862  |
| 1806 | 2463  | 1223  | 4604  |
| 1805 | 2206  | 2055  | 1531  |
| 1803 | 296   | 155   | 213   |
| 1799 | 6129  | 73685 | 41645 |
| 1760 | 1030  | 1180  | 7663  |
| 1753 | 764   | 945   | 601   |
| 1751 | 2109  | 1487  | 1900  |
| 1746 | 3406  | 2280  | 2195  |
| 1744 | 6395  | 3124  | 3610  |

|      |         |         |         |
|------|---------|---------|---------|
| 1737 | 2517    | 2547    | 226     |
| 1735 | 3723    | 1903    | 2141    |
| 1725 | 3056    | 3393    | 3343    |
| 1721 | 951     | 380     | 451     |
| 1719 | 258     | 145     | 1272    |
| 1717 | 10065   | 7106    | 6581    |
| 1713 | 6254    | 2433    | 3563    |
| 1708 | 24102   | 15134   | 14031   |
| 1702 | 16333   | 8864    | 8592    |
| 1701 | 3673    | 1680    | 1692    |
| 1696 | 1031    | 461     | 1021    |
| 1675 | 372     | 327     | 361     |
| 1673 | 2209    | 1275    | 1278    |
| 1666 | 1083    | 5025    | 579     |
| 1661 | 2431819 | 1573098 | 2048030 |
| 1064 | 2242    | 2107    | 2033    |
| 816  | 3243    | 3100    | 2590    |
| 453  | 35060   | 9000    | 29212   |
| 443  | 11996   | 15854   | 11730   |
| 307  | 26220   | 10259   | 6099    |
| 257  | 1521    | 867     | 1210    |
| 168  | 1588    | 636     | 735     |
| 137  | 3819    | 4746    | 4407    |
| 134  | 14183   | 4131    | 5553    |
| 110  | 3573    | 2833    | 3726    |
| 47   | 9326    | 9167    | 7576    |
