# Supplementary material for: A Comparative Analysis of the Metabolomic Response of Electron Beam Inactivated E. coli O26:H11 and Salmonella Typhimurium ATCC 13311
Source: PubMed Central journal article supplement (PMC6465604; doi:10.3389/fmicb.2019.00694), 2019-04-09
Supplement: Data_Sheet_3.pdf [file Data_Sheet_3.pdf]

**Supplementary Data 3. Differentially Expressed Metabolites in *E. coli* O26:H11**

| Metabolite                    | EB 0 h –<br>0 kGy<br>Control | EB 0 h –<br>EB 24 h | 0 kGy<br>Control –<br>EB 24 h | FDR    | p value | -LOG10(p) |
|-------------------------------|------------------------------|---------------------|-------------------------------|--------|---------|-----------|
| 48608                         | *                            |                     | *                             | 0.0001 | 0.0000  | 6.3887    |
| 4-Hydroxybutyric acid         | *                            | *                   |                               | 0.0005 | 0.0000  | 5.5033    |
| 2,4-Diaminobutyric acid       | *                            |                     | *                             | 0.0016 | 0.0000  | 4.8192    |
| Malonic acid                  | *                            |                     | *                             | 0.0018 | 0.0000  | 4.6315    |
| 2,3-Dihydroxybutanedioic acid | *                            |                     | *                             | 0.0031 | 0.0000  | 4.3122    |
| Beta-alanine                  | *                            |                     | *                             | 0.0040 | 0.0001  | 4.0532    |
| Glucose-6-phosphate           |                              | *                   | *                             | 0.0040 | 0.0001  | 4.0328    |
| 2-Hydroxyhexanoic acid        | *                            | *                   | *                             | 0.0040 | 0.0001  | 3.9929    |
| 134760                        | *                            |                     | *                             | 0.0043 | 0.0001  | 3.9083    |
| Glutaric acid                 |                              | *                   | *                             | 0.0049 | 0.0002  | 3.7753    |
| N-acetylornithine             | *                            |                     | *                             | 0.0049 | 0.0002  | 3.7218    |
| Quinovose                     | *                            |                     | *                             | 0.0049 | 0.0002  | 3.6850    |
| Xanthosine                    |                              | *                   | *                             | 0.0049 | 0.0002  | 3.6513    |
| 1702                          | *                            |                     | *                             | 0.0049 | 0.0002  | 3.6049    |
| Indole-3-lactate              |                              | *                   | *                             | 0.0049 | 0.0002  | 3.6048    |
| Nicotinic acid                |                              | *                   | *                             | 0.0049 | 0.0003  | 3.5996    |
| Hydroxyphenyllactic acid      |                              | *                   | *                             | 0.0054 | 0.0003  | 3.5364    |
| 3-Phenyllactic acid           |                              | *                   | *                             | 0.0073 | 0.0004  | 3.3799    |
| 1799                          | *                            |                     | *                             | 0.0100 | 0.0006  | 3.2192    |
| 1996                          | *                            |                     | *                             | 0.0116 | 0.0007  | 3.1313    |
| 7403                          | *                            |                     | *                             | 0.0137 | 0.0009  | 3.0371    |
| Glycolic acid                 | *                            |                     | *                             | 0.0137 | 0.0010  | 3.0076    |
| 4850                          | *                            |                     | *                             | 0.0137 | 0.0010  | 2.9996    |
| 4-Hydroxyphenylacetic acid    |                              | *                   | *                             | 0.0137 | 0.0010  | 2.9791    |
| 1713                          | *                            |                     | *                             | 0.0184 | 0.0015  | 2.8331    |
| 1970                          | *                            |                     | *                             | 0.0197 | 0.0016  | 2.7869    |
| 18177                         | *                            | *                   |                               | 0.0207 | 0.0018  | 2.7490    |
| Citraconic acid               | *                            |                     | *                             | 0.0223 | 0.0020  | 2.7019    |
| 108309                        |                              | *                   | *                             | 0.0235 | 0.0023  | 2.6350    |
| Indole-3-acetate              |                              | *                   | *                             | 0.0235 | 0.0023  | 2.6332    |
| Pinitol                       | *                            |                     | *                             | 0.0235 | 0.0025  | 2.6106    |
| Succinic acid                 |                              | *                   | *                             | 0.0235 | 0.0025  | 2.6081    |
| 110131                        | *                            | *                   |                               | 0.0235 | 0.0025  | 2.6071    |
| 41989                         | *                            |                     | *                             | 0.0253 | 0.0027  | 2.5625    |
| Cysteine                      | *                            |                     | *                             | 0.0258 | 0.0029  | 2.5417    |
| 31285                         |                              | *                   | *                             | 0.0263 | 0.0032  | 2.5008    |
| 5691                          |                              | *                   | *                             | 0.0263 | 0.0032  | 2.4983    |
| 5-Aminovaleric acid           |                              | *                   | *                             | 0.0263 | 0.0032  | 2.4969    |
| N-acetyl-D-galactosamine      | *                            |                     | *                             | 0.0275 | 0.0035  | 2.4572    |
| Fumaric acid                  |                              | *                   | *                             | 0.0275 | 0.0036  | 2.4461    |
| 124568                        | *                            |                     | *                             | 0.0275 | 0.0036  | 2.4432    |
| Phenylpyruvate                |                              |                     | *                             | 0.0275 | 0.0037  | 2.4292    |

|                          |   |   |   |        |        |        |
|--------------------------|---|---|---|--------|--------|--------|
| Ethanolamine             |   | * | * | 0.0275 | 0.0038 | 2.4183 |
| Hypoxanthine             |   | * | * | 0.0275 | 0.0038 | 2.4146 |
| Isoribose                |   | * | * | 0.0281 | 0.0041 | 2.3905 |
| 87282                    |   | * | * | 0.0281 | 0.0041 | 2.3857 |
| 7408                     | * |   | * | 0.0313 | 0.0047 | 2.3297 |
| Alpha-ketoglutarate      | * | * |   | 0.0314 | 0.0048 | 2.3188 |
| Pseudouridine            |   | * | * | 0.0341 | 0.0053 | 2.2743 |
| Propanoic acid           |   | * |   | 0.0371 | 0.0060 | 2.2212 |
| 1760                     | * |   | * | 0.0371 | 0.0060 | 2.2201 |
| Oxalic acid              | * |   | * | 0.0380 | 0.0064 | 2.1936 |
| 4-Hydroxybenzoate        |   | * | * | 0.0380 | 0.0064 | 2.1928 |
| Orotic acid              | * |   | * | 0.0384 | 0.0067 | 2.1767 |
| Citramalic acid          | * |   | * | 0.0384 | 0.0069 | 2.1610 |
| Inosine                  |   | * | * | 0.0384 | 0.0069 | 2.1610 |
| 2-Ketoisocaproic acid    | * |   | * | 0.0384 | 0.0070 | 2.1572 |
| Aspartic acid            |   | * | * | 0.0401 | 0.0074 | 2.1281 |
| D-2-Hydroxyglutaric acid |   | * |   | 0.0401 | 0.0075 | 2.1233 |
| Thymine                  |   |   | * | 0.0416 | 0.0080 | 2.0983 |
| Cysteinylglycine         | * |   | * | 0.0416 | 0.0081 | 2.0927 |
| 32148                    |   | * | * | 0.0468 | 0.0092 | 2.0344 |
| 2031                     | * |   | * | 0.0471 | 0.0095 | 2.0245 |

\*Metabolite has significantly different concentrations between groups
