# Supplementary material for: A Comparative Analysis of the Metabolomic Response of Electron Beam Inactivated E. coli O26:H11 and Salmonella Typhimurium ATCC 13311
Source: PubMed Central journal article supplement (PMC6465604; doi:10.3389/fmicb.2019.00694), 2019-04-09
Supplement: Data_Sheet_4.pdf [file Data_Sheet_4.pdf]

**Supplementary Data 4. Differentially Expressed Metabolites in *S. Typhimurium***

| Metabolite                 | EB 0 h –<br>0 kGy<br>Control | EB 0 h –<br>EB 24 h | 0 kGy<br>Control –<br>EB 24 h | FDR       | p.value   | -LOG10(p) |
|----------------------------|------------------------------|---------------------|-------------------------------|-----------|-----------|-----------|
| Thymine                    | *                            | *                   | *                             | 7.21E-05  | 2.29E-07  | 6.6393    |
| Succinic acid              | *                            | *                   | *                             | 0.0003746 | 2.98E-06  | 5.5259    |
| 3122                       |                              | *                   | *                             | 0.0003746 | 5.27E-06  | 5.2782    |
| 31285                      | *                            | *                   | *                             | 0.0003746 | 6.25E-06  | 5.2038    |
| Hypoxanthine               |                              | *                   | *                             | 0.0003746 | 9.00E-06  | 5.046     |
| Oxalureate                 | *                            |                     | *                             | 0.0003746 | 9.93E-06  | 5.0032    |
| 21511                      | *                            | *                   | *                             | 0.0003746 | 1.02E-05  | 4.991     |
| Tyrosol                    |                              | *                   | *                             | 0.0003746 | 1.18E-05  | 4.9286    |
| 3-Phenyllactic acid        | *                            | *                   | *                             | 0.0003746 | 1.26E-05  | 4.8988    |
| 7403                       | *                            |                     | *                             | 0.0003746 | 1.30E-05  | 4.8854    |
| N-Acetylornithine          | *                            |                     | *                             | 0.0003746 | 1.41E-05  | 4.8515    |
| Oxalic acid                | *                            |                     | *                             | 0.0003746 | 1.43E-05  | 4.8442    |
| 4-Hydroxybutyric acid      | *                            | *                   | *                             | 0.0004326 | 1.79E-05  | 4.7469    |
| Malonic acid               | *                            |                     | *                             | 0.0006491 | 2.89E-05  | 4.5385    |
| Glycolic acid              | *                            | *                   | *                             | 0.0006689 | 3.20E-05  | 4.4955    |
| 2-Hydroxyvaleric acid      | *                            |                     | *                             | 0.000677  | 3.66E-05  | 4.4365    |
| 453                        | *                            | *                   |                               | 0.000677  | 3.67E-05  | 4.4359    |
| Conduritol-beta-epoxide    | *                            |                     | *                             | 0.0007188 | 4.12E-05  | 4.3851    |
| Phenylalanine              | *                            | *                   |                               | 0.0009483 | 5.74E-05  | 4.2412    |
| 46357                      | *                            |                     | *                             | 0.0010682 | 6.80E-05  | 4.1673    |
| Glyceric acid              | *                            | *                   | *                             | 0.0010969 | 7.34E-05  | 4.1345    |
| L-Valine                   | *                            | *                   | *                             | 0.0011305 | 7.92E-05  | 4.1013    |
| Pseudouridine              |                              | *                   | *                             | 0.0012618 | 9.24E-05  | 4.0342    |
| Phenylpyruvate             |                              | *                   | *                             | 0.0012854 | 9.82E-05  | 4.0077    |
| 123989                     | *                            |                     | *                             | 0.0013298 | 0.0001097 | 3.9599    |
| 1996                       | *                            |                     | *                             | 0.0013298 | 0.0001101 | 3.9582    |
| Xanthosine                 | *                            | *                   | *                             | 0.0015058 | 0.0001295 | 3.8878    |
| Isoleucine                 | *                            | *                   |                               | 0.0020557 | 0.0001833 | 3.7368    |
| 2-Pyrrolidinone            | *                            |                     | *                             | 0.0021509 | 0.000202  | 3.6946    |
| 2,4-Dihydroxybutanoic acid | *                            |                     | *                             | 0.0021509 | 0.0002055 | 3.6872    |
| 17830                      |                              | *                   | *                             | 0.0024257 | 0.0002395 | 3.6207    |
| 1852                       | *                            | *                   | *                             | 0.0026584 | 0.0002765 | 3.5583    |
| 146042                     | *                            |                     | *                             | 0.0026584 | 0.0002794 | 3.5538    |
| 160842                     | *                            | *                   | *                             | 0.003138  | 0.0003398 | 3.4688    |
| 110265                     | *                            | *                   | *                             | 0.003913  | 0.0004362 | 3.3603    |
| 145865                     |                              | *                   | *                             | 0.0048798 | 0.0005719 | 3.2427    |
| 7408                       | *                            |                     | *                             | 0.0048798 | 0.000575  | 3.2403    |
| 2042                       |                              | *                   | *                             | 0.0050237 | 0.000608  | 3.2161    |
| Leucine                    | *                            | *                   |                               | 0.005494  | 0.0006834 | 3.1653    |
| 88046                      | *                            | *                   | *                             | 0.005494  | 0.0006999 | 3.155     |
| Guanine                    |                              | *                   | *                             | 0.0059105 | 0.0007718 | 3.1125    |
| Trehalose                  | *                            | *                   | *                             | 0.0060039 | 0.0008031 | 3.0952    |

|                               |   |   |   |           |           |        |
|-------------------------------|---|---|---|-----------|-----------|--------|
| 17002                         |   | * | * | 0.0060981 | 0.0008351 | 3.0783 |
| 130797                        | * |   | * | 0.0064164 | 0.0008991 | 3.0462 |
| 17463                         | * |   | * | 0.0065385 | 0.0009371 | 3.0282 |
| L-Tryptophan                  | * | * |   | 0.007616  | 0.0011157 | 2.9524 |
| Pyrophosphate                 |   | * | * | 0.0078104 | 0.0011691 | 2.9322 |
| 47170                         | * | * |   | 0.0093215 | 0.0014249 | 2.8462 |
| 2233                          | * |   | * | 0.0097486 | 0.0015213 | 2.8178 |
| Propanoic acid                | * |   | * | 0.0098891 | 0.0015747 | 2.8028 |
| Aspartic acid                 |   | * | * | 0.010114  | 0.0016427 | 2.7844 |
| Lysine                        |   | * | * | 0.010276  | 0.0017229 | 2.7637 |
| Ethanolamine                  | * |   | * | 0.010276  | 0.0017344 | 2.7608 |
| 66261                         | * |   | * | 0.010382  | 0.0017854 | 2.7483 |
| 2,4-Diaminobutyric acid       | * |   | * | 0.010884  | 0.0019353 | 2.7133 |
| Beta-Alanine                  | * |   | * | 0.010884  | 0.0019673 | 2.7061 |
| Dehydroabietate               | * |   | * | 0.010884  | 0.0019757 | 2.7043 |
| 2,3-Dihydroxybutanedioic acid | * |   | * | 0.012613  | 0.0023298 | 2.6327 |
| Ornithine                     | * |   | * | 0.012622  | 0.0024279 | 2.6148 |
| D-2-Hydroxyglutaric acid      | * | * | * | 0.012622  | 0.0024408 | 2.6125 |
| Noradrenaline                 | * |   | * | 0.012622  | 0.002483  | 2.605  |
| Galactosylglycerol            | * |   | * | 0.012622  | 0.0024922 | 2.6034 |
| 41989                         | * |   | * | 0.013524  | 0.0027134 | 2.5665 |
| Indole-3-acetate              |   | * | * | 0.01378   | 0.0028087 | 2.5515 |
| 2-Hydroxybenzaldehyde         |   | * | * | 0.015544  | 0.0032177 | 2.4924 |
| 1812                          | * |   | * | 0.016224  | 0.0034101 | 2.4672 |
| 110346                        |   | * | * | 0.017032  | 0.0036341 | 2.4396 |
| 84209                         |   | * | * | 0.017164  | 0.0037171 | 2.4298 |
| Pinitol                       | * |   | * | 0.017378  | 0.0038238 | 2.4175 |
| Pyroglutamic acid             |   |   | * | 0.017378  | 0.0039281 | 2.4058 |
| 2,5-Dihydroxypyrazine         |   |   | * | 0.017378  | 0.0039295 | 2.4057 |
| 2-Hydroxyhexanoic acid        |   | * | * | 0.018988  | 0.0043538 | 2.3611 |
| 4-Hydroxybenzoate             |   | * | * | 0.019101  | 0.0044406 | 2.3526 |
| 88786                         | * | * |   | 0.019747  | 0.0046538 | 2.3322 |
| 3'-Adenylic acid              |   | * | * | 0.020222  | 0.0048301 | 2.316  |
| 5-Methoxytryptamine           |   | * | * | 0.023904  | 0.0057857 | 2.2376 |
| 1719                          |   | * | * | 0.025331  | 0.0062592 | 2.2035 |
| Quinovose                     |   |   | * | 0.025331  | 0.0062925 | 2.2012 |
| 1735                          | * |   | * | 0.025733  | 0.0064742 | 2.1888 |
| 87282                         |   | * |   | 0.029032  | 0.0074568 | 2.1274 |
| 2503                          |   |   | * | 0.029032  | 0.0074892 | 2.1256 |
| Myo-Inositol                  | * |   | * | 0.031351  | 0.0081872 | 2.0869 |
| 112264                        |   | * |   | 0.031365  | 0.0083831 | 2.0766 |
| 2262                          | * |   |   | 0.031365  | 0.0083906 | 2.0762 |
| 1970                          | * |   | * | 0.03142   | 0.0085053 | 2.0703 |
| 32148                         |   |   | * | 0.032109  | 0.0087943 | 2.0558 |
| 1713                          | * |   |   | 0.033008  | 0.0091455 | 2.0388 |
| 84565                         |   | * | * | 0.035117  | 0.0098418 | 2.0069 |
| 1969                          |   | * |   | 0.037358  | 0.010589  | 1.9752 |

|                            |   |   |   |          |          |        |
|----------------------------|---|---|---|----------|----------|--------|
| 4-Hydroxyphenylacetic acid |   | * | * | 0.038151 | 0.010935 | 1.9612 |
| Threonine                  | * |   | * | 0.039247 | 0.011374 | 1.9441 |
| Glucose                    |   | * | * | 0.040043 | 0.011802 | 1.928  |
| Glutamic acid              |   |   | * | 0.040043 | 0.01186  | 1.9259 |
| 1721                       | * |   | * | 0.041419 | 0.012399 | 1.9066 |
| Citrulline                 |   |   | * | 0.045244 | 0.013689 | 1.8636 |
| Urocanic acid              |   | * |   | 0.045693 | 0.01397  | 1.8548 |
| Alanine                    | * |   | * | 0.049051 | 0.015153 | 1.8195 |
| Inosine                    |   | * | * | 0.049631 | 0.01549  | 1.8099 |
